# Supplementary material for: iRegNet3D: three-dimensional integrated regulatory network for the genomic analysis of coding and non-coding disease mutations
Source: PubMed Central journal article supplement (PMC5241969; doi:10.1186/s13059-016-1138-2), 2017-01-18

**a**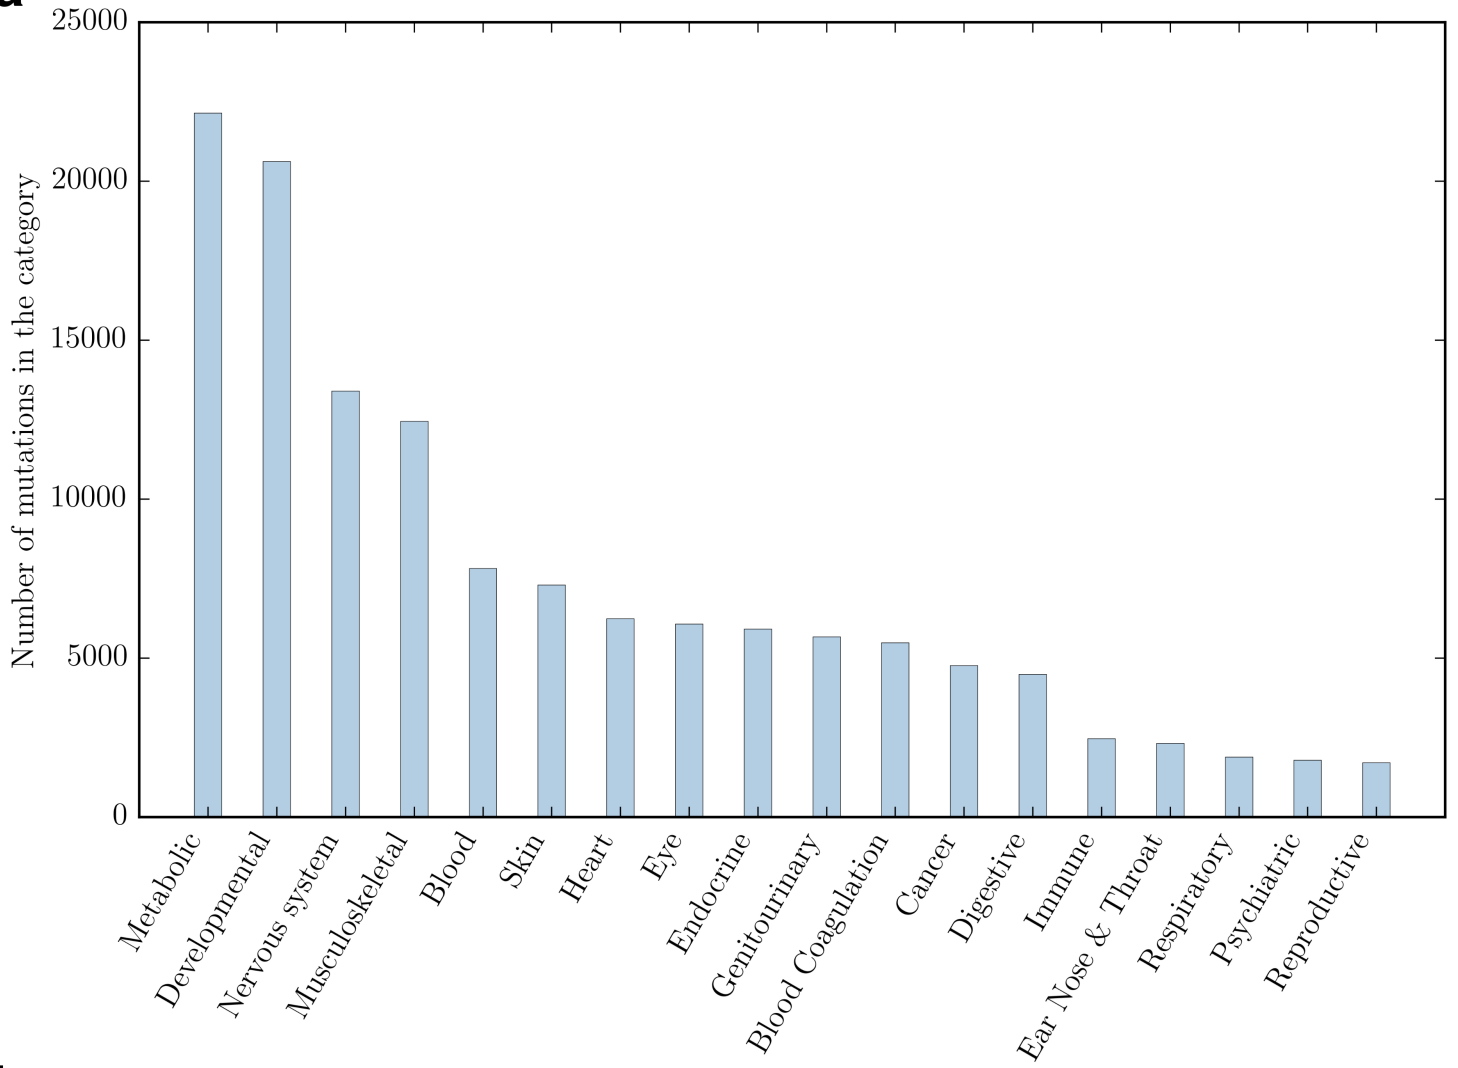**b**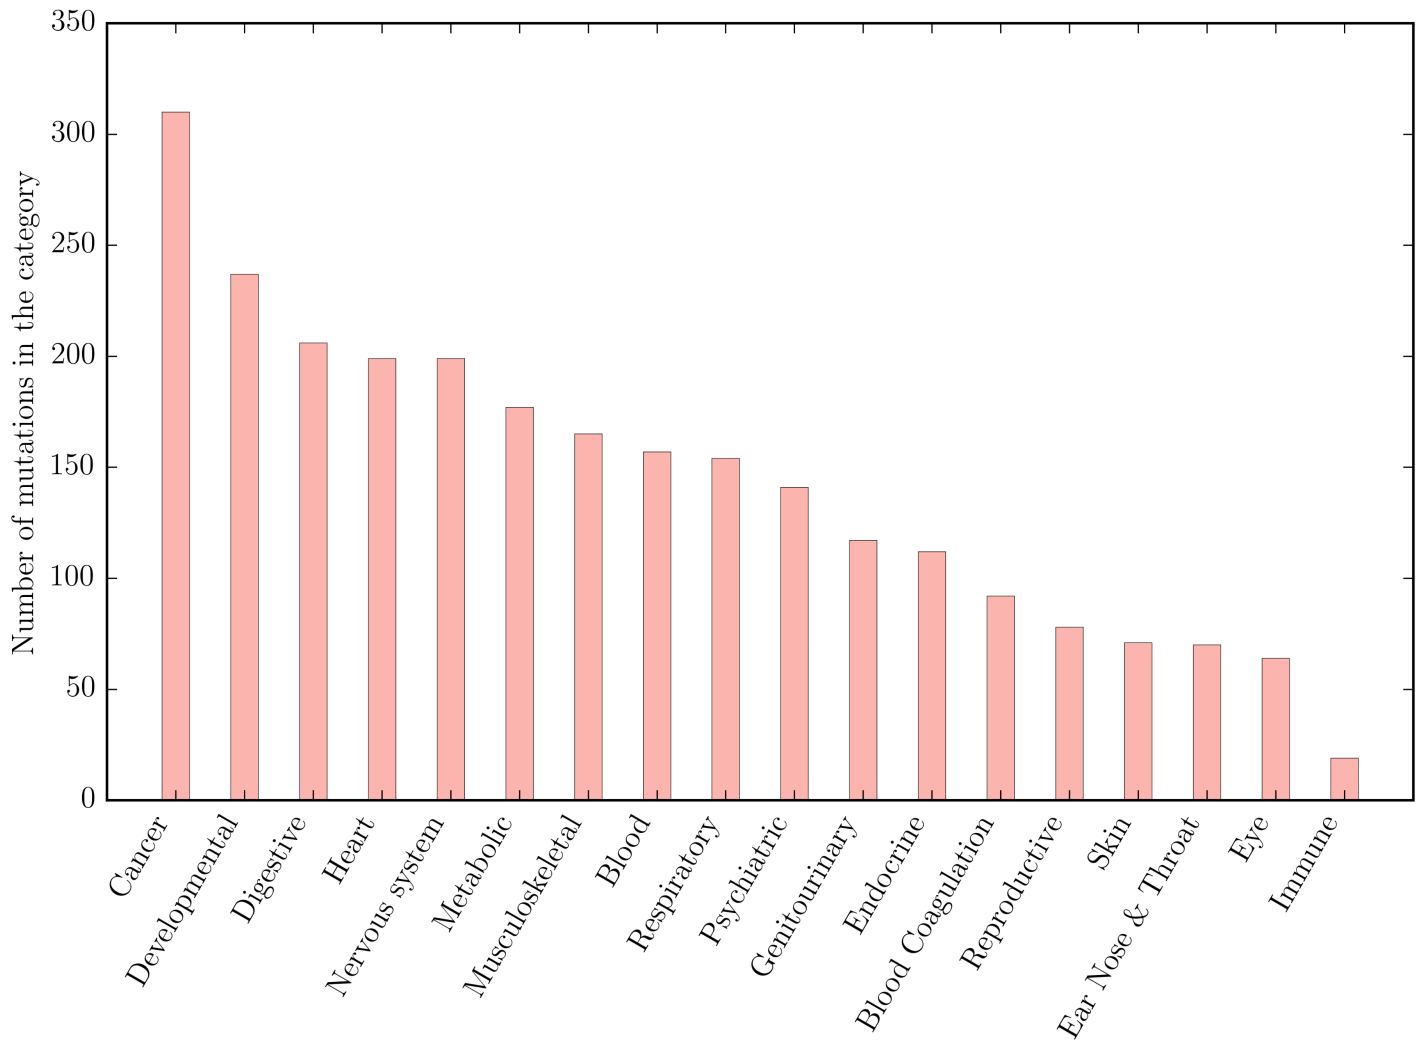

Supplement: 13059_2016_1138_MOESM1_ESM.pdf [file 13059_2016_1138_MOESM1_ESM.pdf]
